# Supplementary material for: High relaxivity MRI imaging reagents from bimodal star polymers
Source: Royal Society of Chemistry journal article supplement (doi:10.1039/c1py00474c), 2011-12-01
Supplement: c1py00474c.pdf [file c1py00474c.pdf]

## Supplemental Materials

# High Relaxivity MRI Imaging Reagents from Bimodal Star Polymers

*Chinessa T. Adkins,<sup>a#</sup> Julia N. Dobish,<sup>a#</sup> Clifford S. Brown,<sup>a</sup> Brian Mayrhoen,<sup>a</sup> Sharon K. Hamilton,<sup>a</sup>  
Felicia Udoji,<sup>a</sup> ; Kelly Radford,<sup>b</sup>; Thomas E. Yankeelov<sup>c</sup> John C. Gore<sup>c</sup> and Eva Harth<sup>a\*</sup>*

<sup>a</sup> Department of Chemistry, Institute of Nanoscale Science and Engineering, Vanderbilt Institute of Chemical Biology, Vanderbilt University, 7619 Stevenson Center, Nashville, TN 37325; Lipscomb University, College of Pharmacy, Nashville, TN 37204; <sup>c</sup>Vanderbilt University Institute of Imaging Science, 1161 21st Avenue South, Medical Center North, AA-1105 Nashville, TN 37232-2310

# contributed equally

eva.harth@vanderbilt.edu

## Cell Uptake Time Study of Star Polymer Contrast reagent without molecular transporter with blue fluorescent from Star Polymer Core, 7.

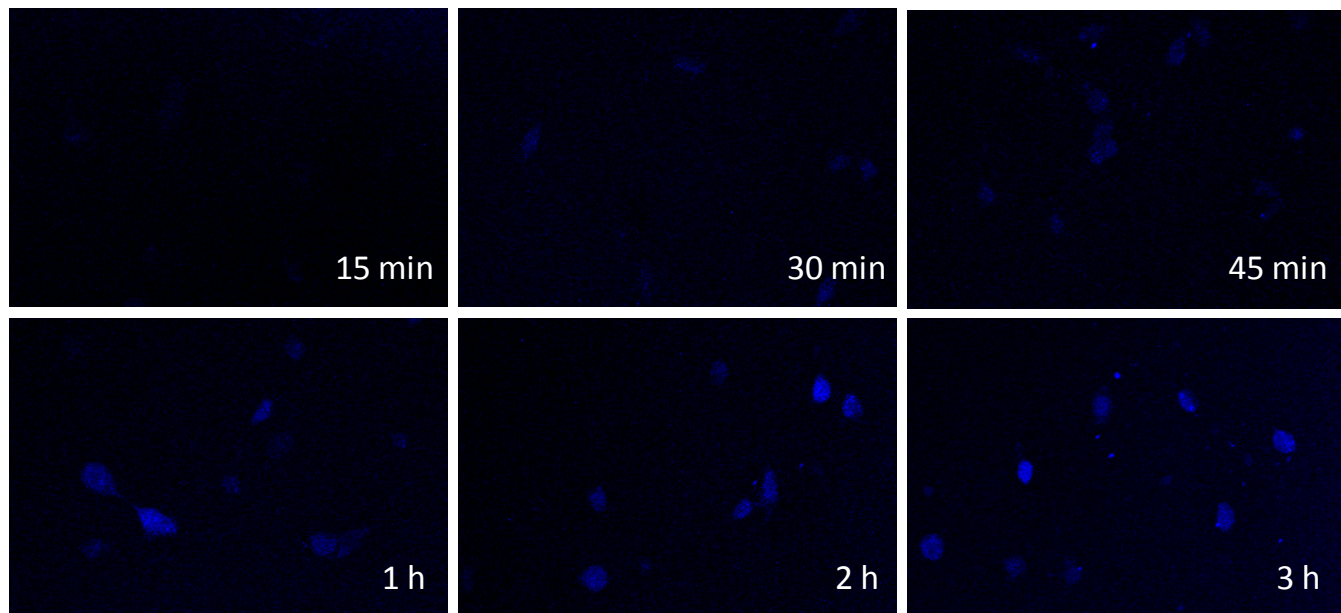

**Figure 2a.** Cellular uptake experiments of functionalized fluorescent star polymers, 7, into NIH 3T3 cells investigated via confocal microscopy, DAPI filter (425-525 nm) at 20x magnification. Each image was taken at  $h\nu = 710$ , offset = 15, and laser 405 strength at 5%. The cells were incubated for 3 h with a 300  $\mu\text{M}$  solution in water.

## Cell Uptake Time Study of Star Polymer Contrast reagent with molecular transporter with blue fluorescence from Star Polymer Core, **8**.

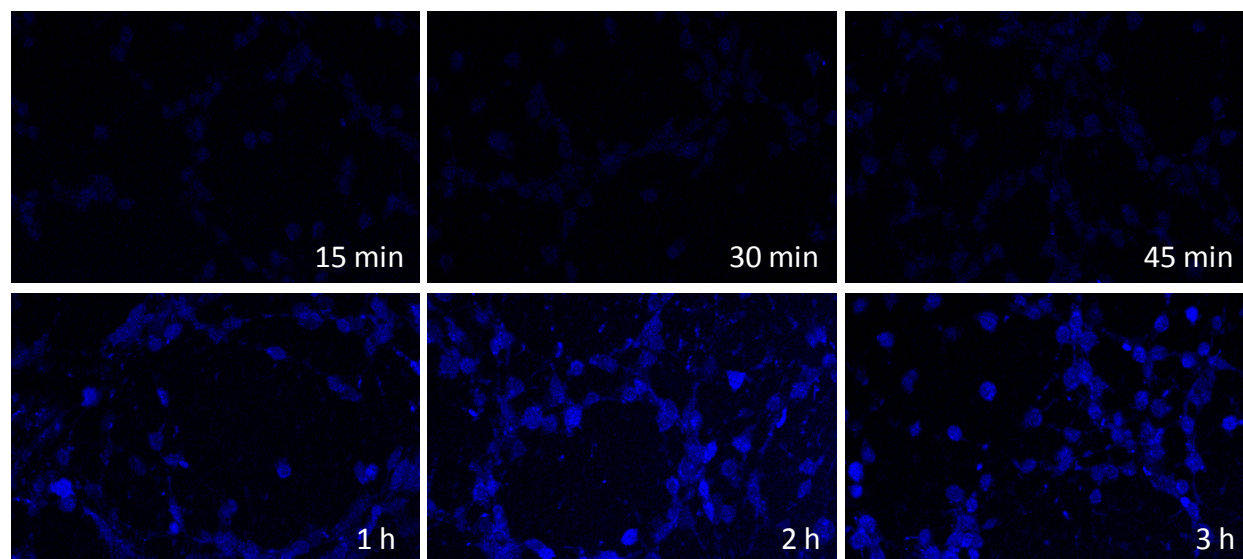

**Figure 4a.** Cellular uptake experiments of functionalized fluorescent star polymers, **8**, into NIH 3T3 cells investigated via confocal microscopy, DAPI filter (425-525 nm) at 20x magnification. Each image was taken at  $h\nu = 710$ , offset = 15, and laser 405 strength at 5%. The cells were incubated for 3 h with a 300  $\mu\text{M}$  solution in water.
